# Supplementary material
Source: HighWire-hosted journal article supplement (http://rc.rcjournal.com/highwire/filestream/11911/field_highwire_adjunct_files/0/RC-02269.R2_Zhang_Suppl.pdf)
Supplement: RC-02269.R2_Zhang_Suppl.pdf [file RC-02269.R2_Zhang_Suppl.pdf]

**Supplementary Table S1. Basic Characteristics of Study Subjects**

| Variables                |                     | N (Total n=413) | %    |
|--------------------------|---------------------|-----------------|------|
| Age (Years)              | ≥ 50                | 42              | 10.2 |
|                          | 51-60               | 103             | 24.9 |
|                          | 61-70               | 137             | 33.2 |
|                          | 71-80               | 108             | 26.2 |
|                          | ≤ 81                | 23              | 5.5  |
| Sex                      | Male                | 298             | 72.2 |
|                          | Female              | 115             | 27.8 |
| Education Level          | ≤ Elementary School | 95              | 23.0 |
|                          | Middle School       | 123             | 29.7 |
|                          | High School         | 94              | 22.8 |
|                          | ≥ College           | 101             | 24.5 |
| Marital Status           | Co-Inhabited        | 5               | 1.2  |
|                          | Married             | 327             | 79.2 |
|                          | Separated           | 10              | 2.4  |
|                          | Divorced            | 13              | 3.2  |
|                          | Widowed             | 58              | 14.0 |
| Disease Duration (Years) | ≤5                  | 43              | 10.4 |
|                          | 6 ~ 10              | 106             | 37.8 |
|                          | 11 ~ 15             | 115             | 27.8 |
|                          | 16 ~ 20             | 52              | 12.6 |
|                          | ≥21                 | 47              | 11.4 |
| Clinic Location          | Outpatient          | 139             | 33.7 |
|                          | Inpatient           | 274             | 66.3 |

**Supplementary Table S2. The 51-Item COPD Self-Management Scale**

1. I practice breathing exercises (e.g. abdominal breathing) when I do not feel shortness of breath. (A1)
2. I inhale bronchodilators (e.g. salbutamol, terbutaline) when I feel shortness of breath. (A2)
3. I exercise more than 2-3hours per week when my disease is stable. (B1)
4. I wear enough clothes to keep warm to avoid catching cold in winter. (B2)
5. I often encourage myself to be optimistic. (C1)
6. I try not to lose temper on others. (C2)
7. I communicate disease-related information with other COPD patients. (D1)
8. I get disease-related information through the Internet or medical books. (D2)
9. I think I can alleviate discomfortable symptoms by my own. (E1)
10. I take effective means (e.g. chest percussion method) to clear sputum during cough. (A3)
11. I seek help (e.g. call an ambulance or relatives) when the shortness of breath worsens rapidly. (A4)
12. I avoid eating foods containing too much sugar or calories (e.g. coke). (B3)
13. I take much water when I do not have edema or much sputum. (B4)
14. I talk with relatives and friends when I feel upset or anxious. (C3)
15. I seek help and consolation with my family or friends when I feel down. (C4)
16. I discuss with medical staff about issues related to the disease (e.g. is the disease infectious?) (D3)
17. I keep complete records of my disease-related documents (e.g. patient medical records, medical examination results). (D4)
18. I think I can take effective exercises. (E2)
19. I do not take steroids (e.g. prednisone, dexamethasone) when I feel serious shortness of breath. (A5)
20. I take flu vaccination 1-2 times yearly. (B5)
21. I train myself to be more resistant to coldness (e.g. wash face with cold water in summer and autumn). (B6)
22. I think I can control bad moods caused by COPD (e.g. anxiety, depression). (C5)
23. I try my best to change the though that I am a burden to the family. (C6)
24. I often read newspapers to learn disease-related information. (D5)
25. I can actively stick to the doctor's prescription instructions. (E3)
26. I can find solutions when the disease recurs. (E4)
27. I inhale oxygen 1-2 mL/minute when I feel serious shortness of breath. (A6)
28. I use heating facilities to raise room temperature in cold weather. (B7)
29. I adjust my exercise intensity according to my health status (e.g. just walk around the house when I feel uncomfortable). (B8)
30. I think my control of symptoms can ease the burden of my family. (C7)

31. I do not dwell on unpleasant things. (C8)
32. I consult with medical staff when I have questions about treatment. (D6)
33. I think I can get disease-related information as long as I try. (E5)
34. I think I can optimistically face COPD. (E6)
35. I automatically follow the doctor's prescription instructions. (A7)
36. I avoid eating raw, cold and hard food. (B9)
37. I often open windows to ventilate rather than directly face the wind. (B10)
38. I adjust my exercise speed according to my health status. (B11)
39. I try to look at the bright side of life. (C9)
40. I divert my attention to interesting things when I am in bad mood. (C10)
41. I make a list of all my questions when I consult with medical staff. (D7)
42. I think I can effectively prevent catching cold. (E7)
43. I think I can handle housework independently. (E8)
44. I do not take anti-inflammatory drugs when I feel serious shortness of breath. (A8)
45. I try to avoid inhaling dust, smoke and noxious fumes. (B12)
46. I pick appropriate means of exercises (e.g. walking, jogging, bicycling). (B13)
47. I talk with medical staff when I feel upset or anxious about the disease. (C11)
48. I exchange psychological experiences with other patients with similar diseases. (C12)
49. I do appropriate amount of housework (e.g. cleaning, grocery shopping) according to my health status. (B14)
50. I modify my mood (e.g. anxiety, depression) through exercises. (E9)
51. I consult with medical staff when I have questions about my medical examination results. (D8)

**Note:** The responses to each item were graded on a 5-point scale (1=never, 2=rarely, 3=sometimes, 4=often, and 5=always). The domain each item belongs to is marked as follows: A1-A8, symptom management; B1-B14, daily life management; C1-C12, emotion management; D1-D8, information management; E1-E9, self-efficacy.
